# Supplementary material for: Understanding mono- and bi-metallic Au and Ni nanoparticle responses to fast heating
Source: Royal Society of Chemistry journal article supplement (doi:10.1039/d4na00634h), 2024-01-01
Supplement: d4na00634h1.pdf [file d4na00634h1.pdf]

## Supplementary Materials

(a)

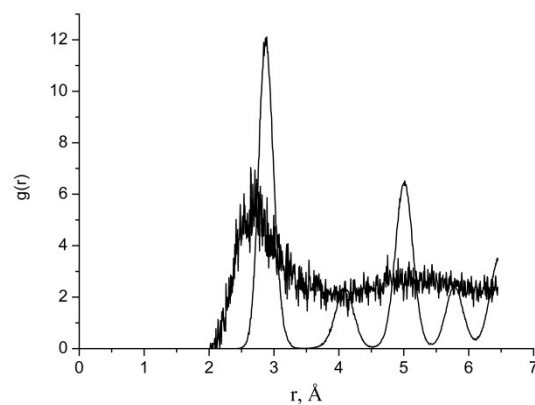

(b)

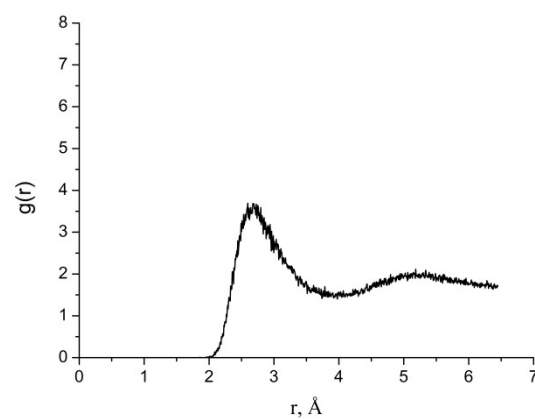

Figure 1S. Calculated radial distribution function (RDF) for Au cluster with  $R=20uc$ , (a) -at  $t=0.1$  ps and (b) - at  $t=10$  ps. In figure (a) all the results correspond to Au cluster with  $R=50uc$  showing partial melting that is then completed in (b). Calculated radial distribution function (RDF) (50) for Au cluster with radius  $R=50uc$  obtained at  $t=10$  ps.

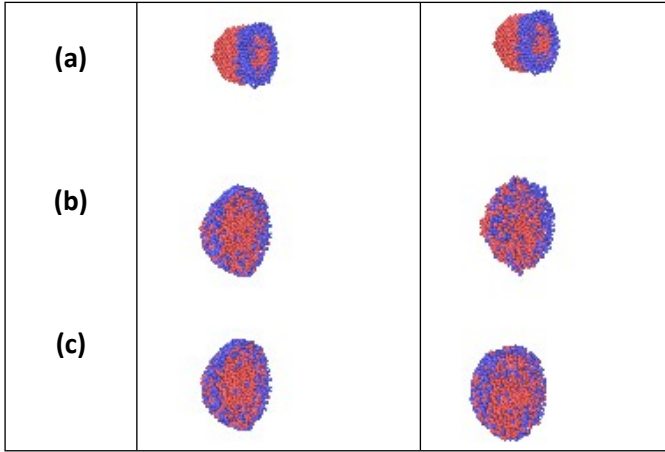

Figure 2S. Snapshots obtained in the heating of Janus AuNi nanoparticles with heating shown above. Slice view calculated at 5, 80, and 100 ps, the left column is for  $T_{\max}=400$  and the right one is for  $T_{\max}=2700$ K.

**Equation (S1)**

$$G^{XS} = X_{\text{Ni}}X_{\text{Au}}(24,140X_{\text{Au}} + 38,280X_{\text{Ni}} - 14,230X_{\text{Au}}X_{\text{Ni}})\left(1 - \frac{T}{2660}\right) \text{J}$$

where  $X_{\text{Ni}}$  and  $X_{\text{Au}}$  are Ni and Au molar fractions, respectively (63-65).

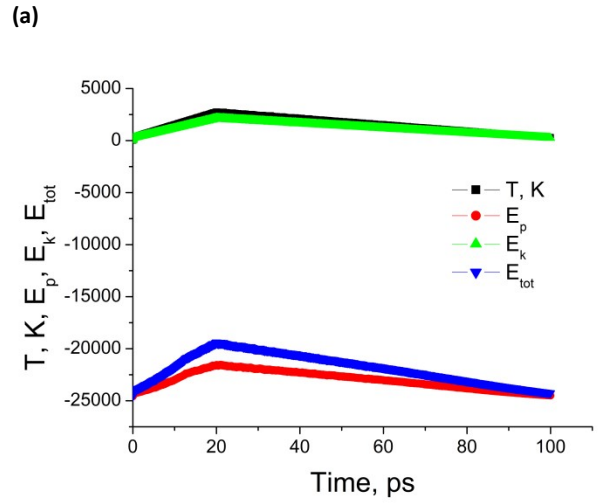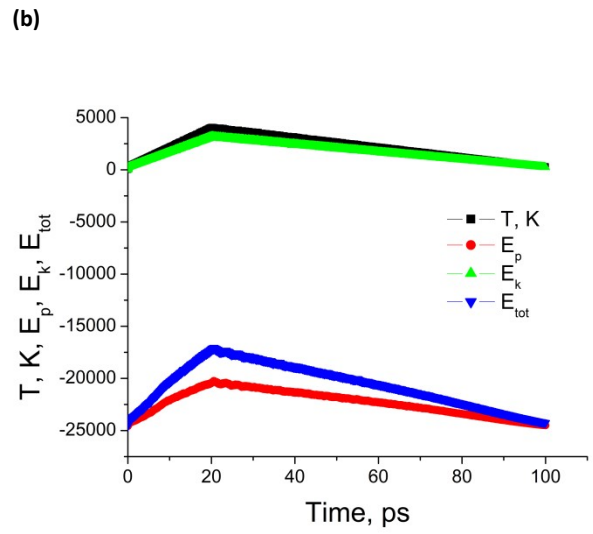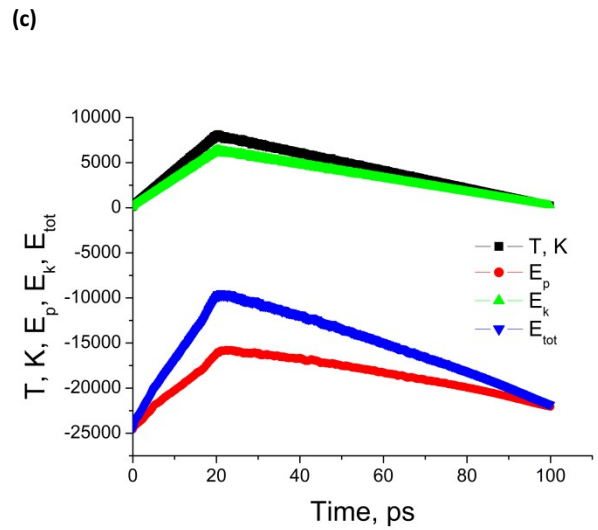

Figure 3S. Calculated temperature and NP energies vs time for AuNi Janus NP and  $T_{\max}=2700$ K (a), 4000 K (b), and 8000 K (c). Energy units are cal/mol.
